# Supplementary material for: Evaluation of N 6 -methyldeoxyadenosine antibody-based genomic profiling in eukaryotes
Source: HighWire-hosted journal article supplement (doi:10.1101/gr.276696.122), 2023-02-14
Supplement: Supplemental_Code.zip [file m6A Dot-Blot raw quant data.xlsx]

## Sheet: Sheet1
Figure 1b
		MP1 antibody								AB1 antibody
		500ng	50ng	5ng	0.5ng	0.05ng	0.005ng	0.0005ng		50ng	5ng	0.5ng	0.05ng	0.005ng
	m6A-MTase treated (20 U)	61594.4	54385.2	48768.4	40265.3	17406.2	4679.03	0		67612.9	67286.5	44949.2	14375.1	5054.96
	untreated	0	0	0	0	0	0	0		25805.2	4838.46	0	0	0
		AM1 antibody						SS1 Antibody						SS2 antibody
		50ng	5ng	0.5ng	0.05ng	0.005ng		50ng	5ng	0.5ng	0.05ng	0.005ng		50ng	5ng	0.5ng	0.05ng	0.005ng	0.0005ng
	m6A-MTase treated (20 U)	55829.4	46168.5	8102.32	0	0		63235.4	65071.4	51653.4	23249.8	5366.45		59466.1	60323.8	38675.2	11152.9	5062.12	0
	untreated	28967.4	3763.03	0	0	0		53462.3	39637	7636.66	0	0		40106.3	6412.52	0	0	0	0
Figure 1d
		1000ng	333ng	111ng	37ng	12.3ng	4.1ng	1.4ng	0.46ng	0.15ng	0.05ng	0.005ng		normalize to:
	Units of m6A-Mtase
	20 U	55140.6	49371.9	46032.2	39896.7	31316.2	25598.2	20578.3	15198.5	13448.1	1368.34	0		55140.6
	0.6 U	37115.5	30275.5	23560.5	17178.4	8300.02	1362.85	0	0	0	0	0		42636.6
	0.075 U	17445	3464.41	0	0	0	0	0	0	0	0	0		43824.5
	0 U	969.263	0	0	0	0	0	0	0	0	0	0		42620.9
Figure 2b		500ng	50ng	5ng		normalize to:
	A. thaliana	2292.16	0	0		51749
	C. reinhardtii	53845.4	44502.1	4134.48		53845.4
	D. melanogaster	5670.35	0	0		51749
	s2 nuclei, 0 U	831.678	0	0		51629.6
	s2 nuclei, 0.025 U	1036.43	0	0		51629.6
	s2 nuclei, 0.05 U	2266.58	0	0		51629.6
	s2 nuclei, 0.1 U	27897.6	987.263	0		51629.6
	s2 nuclei, 0.2 U	38978.5	3888.23	0		51629.6
	s2 nuclei, 0.4 U	51541.6	37856	3284.65		51541.6
Figure S2-A
	Sample	500ng	50ng	5ng	0.5ng	0.05ng	0.005ng	0.0005ng		normalize to:
	MP1 Untreated	0	0	0	0	0	0	0
	MP1 20 U	35859.5	31010.4	27664.4	22586.4	9900.54	2963.26	0		35859.5
	MP1 2 U	28474.2	24577.5	18805.2	5667.71	0	0	0		36646.8
	MP1 0.2 U	7889.42	1595.63	0	0	0	0	0		36698.8
	AB1 Untreated		15424.3	411.849	0	0	0	0		36496.5
	AB1 20 U		36496.5	36353	24161.6	8222.32	702.92	0		36496.5
	AB1 2 U		32202.7	30682.3	10816	0	0	0		38143.8
	AB1 0.2 U		15361.2	6045.02	0	0	0	0
	AM1 Untreated		16457.9	2083.3	0	0	0	0		29993
	AM1 20 U		29993	24582.7	4506.59	0	0	0		29993
	AM1 2 U		24983.8	13917	0	0	0	0		29993
	AM1 0.2 U		22833.8	5810.54	0	0	0	0		29993
	SS1 Untreated		29821.7	23291.3	1419.65	0	0	0		64551.4
	SS1 20 U		64551.4	46741	29822.2	14637.2	1865.06	0		64551.4
	SS1 2 U		33641.5	28600.9	18463.6	2177.13	0	0		64551.4
	SS1 0.2 U		27732.2	22764.7	7106.15	0	0	0		64551.4
	SS2 Untreated		20800.6	651.749	0	0	0	0		36957.6
	SS2 20 U		36957.6	37036.9	25245.9	10205.4	337.678	0		36957.6
	SS2 2 U		34067.2	23745.3	10447.5	0	0	0		36957.6
	SS2 0.2 U		23088.5	13030.2	0	0	0	0		36957.6
Figure S2-B
	Sample	500ng	50ng	5ng	0.5ng	0.05ng	0.005ng	0.0005ng		normalize to:
	AM3 m6A_Mtase treated	24654.5	27995.4	26558.6	7292.49	1659.09	0	0		24654.5
	AM3 Untreated	1066.85	0	0	0	0	0	0		24654.5
	MP2 m6A_Mtase treated	23841	29373.9	28887.5	12604.9	2138.28	0	0		23841
	MP2 Untreated	4858.28	0	0	0	0	0	0		23841
	SA1 m6A_Mtase treated	24256.9	32909.3	27246.7	11178.9	2199.04	0	0		24256.9
	SA1 Untreated	13263.3	1878.16	0	0	0	0	0		24256.9
	AM2 m6A_Mtase treated	20716.9	28965.3	13193.3	4041.91	0	0	0		20716.9
	AM2 Untreated	7700.59	3979.38	1200.26	0	0	0	0		20716.9
	DG1 m6A_Mtase treated	17369.5	29291.3	17594.8	3858.08	0	0	0		17369.5
	DG1 Untreated	14337.3	3998.62	739.192	0	0	0	0		17369.5
MP1	Sample	DNA Concentration	Negative Control	20U
	MP1	500ng	0	1
	MP1	50ng	0	0.882958
	MP1	5ng	0	0.791767
	MP1	0.5ng	0	0.653717
	MP1	0.05ng	0	0.282594
	MP1	0.005ng	0	0.0759653
	MP1	0.0005ng	0	0
AB1	AB1	50ng	0.381661	1
	AB1	5ng	0.0715611	0.995172
	AB1	0.5ng	0	0.664801
	AB1	0.05ng	0	0.212608
	AB1	0.005ng	0	0.0747632
AM1	AM1	50ng	0.518856	1
	AM1	5ng	0.0674024	0.826958
	AM1	0.5ng	0	0.145126
	AM1	0.05ng	0	0
	AM1	0.005ng	0	0
SS1	SS1	50ng	0.845449	1
	SS1	5ng	0.626817	1.02903
	SS1	0.5ng	0.120766	0.816843
	SS1	0.05ng	0	0.36767
	SS1	0.005ng	0	0.0848646
SS2	SS2	50ng	0.674439	1
	SS2	5ng	0.107835	1.01442
	SS2	0.5ng	0	0.650374
	SS2	0.05ng	0	0.187551
	SS2	0.005ng	0	0.0851262
	SS2	0.005ng	0	0
					0.6U	0.075U	0U
MP1_1b	MP1_1b	1000ng	0.0227415	1	0.870508	0.398066	0.0227415
	MP1_1b	333ng	0	0.895382	0.710082	0.0790519	0
	MP1_1b	111ng	0	0.834815	0.552589	0	0
	MP1_1b	37.0ng	0	0.723545	0.402903	0	0
	MP1_1b	12.3ng	0	0.567933	0.194669	0	0
	MP1_1b	4.1ng	0	0.464234	0.0319643	0	0
	MP1_1b	1.4ng	0	0.373197	0	0	0
	MP1_1b	0.46ng	0	0.275631	0	0	0
	MP1_1b	0.15ng	0	0.243888	0	0	0
	MP1_1b	0.05ng	0	0.0248154	0	0	0
	MP1_1b	0.005ng		0	0	0	0
	A. thaliana	500ng	0.0442939
	A. thaliana	50ng	0
	A. thaliana	5ng	0
	A. thaliana	0.5ng	0
	C. reinhardtii	500ng	1.00757
	C. reinhardtii	50ng	0.832733
	C. reinhardtii	5ng	0.0773652
	C. reinhardtii	0.5ng	0
	D. melanogaster	500ng	0.109574
	D. melanogaster	50ng	0
	D. melanogaster	5ng	0
	D. melanogaster	0.5ng	0
	s2 nuclei, 0 U	500ng	0.0161086
	s2 nuclei, 0 U	50ng	0
	s2 nuclei, 0 U	5ng	0
	s2 nuclei, 0 U	0.5ng	0
	s2 nuclei, 0.025 U	500ng	0.0200744
	s2 nuclei, 0.025 U	50ng	0
	s2 nuclei, 0.025 U	5ng	0
	s2 nuclei, 0.025 U	0.5ng	0
	s2 nuclei, 0.05 U	500ng	0.0439008
	s2 nuclei, 0.05 U	50ng	0
	s2 nuclei, 0.05 U	5ng	0
	s2 nuclei, 0.05 U	0.5ng	0
	s2 nuclei, 0.1 U	500ng	0.540342
	s2 nuclei, 0.1 U	50ng	0.019122
	s2 nuclei, 0.1 U	5ng	0
	s2 nuclei, 0.1 U	0.5ng	0
	s2 nuclei, 0.2 U	500ng	0.754964
	s2 nuclei, 0.2 U	50ng	0.0753102
	s2 nuclei, 0.2 U	5ng	0
		0.5ng	0
	s2 nuclei, 0.4 U	500ng	1
	s2 nuclei, 0.4 U	50ng	0.734475
	s2 nuclei, 0.4 U	5ng	0.0637281
	s2 nuclei, 0.4 U	0.5ng	0
	MP1 Untreated	500ng	0
	MP1 Untreated	50ng	0
	MP1 Untreated	5ng	0
	MP1 Untreated	0.5ng	0
	MP1 Untreated	0.05ng	0
	MP1 Untreated	0.005ng	0
	MP1 Untreated	0.005ng	0
	MP1 20 U	500ng	1
	MP1 20 U	50ng	0.864774
	MP1 20 U	5ng	0.771467
	MP1 20 U	0.5ng	0.629858
	MP1 20 U	0.05ng	0.276092
	MP1 20 U	0.005ng	0.0826351
	MP1 20 U	0.005ng	0
	MP1 2 U	500ng	0.776989
	MP1 2 U	50ng	0.670659
	MP1 2 U	5ng	0.513147
	MP1 2 U	0.5ng	0.154658
	MP1 2 U	0.05ng	0
	MP1 2 U	0.005ng	0
	MP1 2 U	0.005ng	0
	MP1 0.2 U	500ng	0.214977
	MP1 0.2 U	50ng	0.043479
	MP1 0.2 U	5ng	0
	MP1 0.2 U	0.5ng	0
	MP1 0.2 U	0.05ng	0
	MP1 0.2 U	0.005ng	0
	MP1 0.2 U	0.005ng	0
	AB1 Untreated	500ng	0.422623
	AB1 Untreated	50ng	0.0112846
	AB1 Untreated	5ng	0
	AB1 Untreated	0.5ng	0
	AB1 Untreated	0.05ng	0
	AB1 Untreated	0.005ng	0
	AB1 Untreated	0.005ng	0
	AB1 20 U	500ng	1
	AB1 20 U	50ng	0.996069
	AB1 20 U	5ng	0.662025
	AB1 20 U	0.5ng	0.225291
	AB1 20 U	0.05ng	0.0192599
	AB1 20 U	0.005ng	0
	AB1 20 U	0.005ng	0
	AB1 2 U	500ng	0.844244
	AB1 2 U	50ng	0.804384
	AB1 2 U	5ng	0.283558
	AB1 2 U	0.5ng	0
	AB1 2 U	0.05ng	0
	AB1 2 U	0.005ng	0
	AB1 2 U	0.005ng	0
	AB1 0.2 U	500ng	0.402719
	AB1 0.2 U	50ng	0.15848
	AB1 0.2 U	5ng	0
	AB1 0.2 U	0.5ng	0
	AB1 0.2 U	0.05ng	0
	AB1 0.2 U	0.005ng	0
	AB1 0.2 U	0.005ng	0
	AM1 Untreated	500ng	0.548726
	AM1 Untreated	50ng	0.0694598
	AM1 Untreated	5ng	0
	AM1 Untreated	0.5ng	0
	AM1 Untreated	0.05ng	0
	AM1 Untreated	0.005ng	0
	AM1 Untreated	0.005ng	0
	AM1 20 U	500ng	1
	AM1 20 U	50ng	0.819616
	AM1 20 U	5ng	0.150255
	AM1 20 U	0.5ng	0
	AM1 20 U	0.05ng	0
	AM1 20 U	0.005ng	0
	AM1 20 U	0.005ng	0
	AM1 2 U	500ng	0.832989
	AM1 2 U	50ng	0.464008
	AM1 2 U	5ng	0
	AM1 2 U	0.5ng	0
	AM1 2 U	0.05ng	0
	AM1 2 U	0.005ng	0
	AM1 2 U	0.005ng	0
	AM1 0.2 U	500ng	0.761304
	AM1 0.2 U	50ng	0.19373
	AM1 0.2 U	5ng	0
	AM1 0.2 U	0.5ng	0
	AM1 0.2 U	0.05ng	0
	AM1 0.2 U	0.005ng	0
	AM1 0.2 U	0.005ng	0
	SS1 Untreated	500ng	0.461984
	SS1 Untreated	50ng	0.360818
	SS1 Untreated	5ng	0.0219925
	SS1 Untreated	0.5ng	0
	SS1 Untreated	0.05ng	0
	SS1 Untreated	0.005ng	0
	SS1 Untreated	0.005ng	0
	SS1 20 U	500ng	1
	SS1 20 U	50ng	0.72409
	SS1 20 U	5ng	0.461992
	SS1 20 U	0.5ng	0.226753
	SS1 20 U	0.05ng	0.0288927
	SS1 20 U	0.005ng	0
	SS1 20 U	0.005ng	0
	SS1 2 U	500ng	0.521158
	SS1 2 U	50ng	0.443072
	SS1 2 U	5ng	0.28603
	SS1 2 U	0.5ng	0.0337271
	SS1 2 U	0.05ng	0
	SS1 2 U	0.005ng	0
	SS1 2 U	0.005ng	0
	SS1 0.2 U	500ng	0.429614
	SS1 0.2 U	50ng	0.35266
	SS1 0.2 U	5ng	0.110085
	SS1 0.2 U	0.5ng	0
	SS1 0.2 U	0.05ng	0
	SS1 0.2 U	0.005ng	0
	SS1 0.2 U	0.005ng	0
	SS2 Untreated	500ng	0.562822
	SS2 Untreated	50ng	0.017635
	SS2 Untreated	5ng	0
	SS2 Untreated	0.5ng	0
	SS2 Untreated	0.05ng	0
	SS2 Untreated	0.005ng	0
	SS2 Untreated	0.005ng	0
	SS2 20 U	500ng	1
	SS2 20 U	50ng	1.00215
	SS2 20 U	5ng	0.683103
	SS2 20 U	0.5ng	0.276138
	SS2 20 U	0.05ng	0.0091369
	SS2 20 U	0.005ng	0
	SS2 20 U	0.005ng	0
	SS2 2 U	500ng	0.921791
	SS2 2 U	50ng	0.6425
	SS2 2 U	5ng	0.282688
	SS2 2 U	0.5ng	0
	SS2 2 U	0.05ng	0
	SS2 2 U	0.005ng	0
	SS2 2 U	0.005ng	0
	SS2 0.2 U	500ng	0.62473
	SS2 0.2 U	50ng	0.352572
	SS2 0.2 U	5ng	0
	SS2 0.2 U	0.5ng	0
	SS2 0.2 U	0.05ng	0
	SS2 0.2 U	0.005ng	0
	SS2 0.2 U	0.005ng	0
	AM3 m6A_Mtase treated	500ng	1
	AM3 m6A_Mtase treated	50ng	1.13551
	AM3 m6A_Mtase treated	5ng	1.07723
	AM3 m6A_Mtase treated	0.5ng	0.295788
	AM3 m6A_Mtase treated	0.05ng	0.0672937
	AM3 m6A_Mtase treated	0.005ng	0
	AM3 m6A_Mtase treated	0.005ng	0
	AM3 Untreated	500ng	0.043272
	AM3 Untreated	50ng	0
	AM3 Untreated	5ng	0
	AM3 Untreated	0.5ng	0
	AM3 Untreated	0.05ng	0
	AM3 Untreated	0.005ng	0
	AM3 Untreated	0.005ng	0
	MP2 m6A_Mtase treated	500ng	1
	MP2 m6A_Mtase treated	50ng	1.23208
	MP2 m6A_Mtase treated	5ng	1.21167
	MP2 m6A_Mtase treated	0.5ng	0.528709
	MP2 m6A_Mtase treated	0.05ng	0.0896895
	MP2 m6A_Mtase treated	0.005ng	0
	MP2 m6A_Mtase treated	0.005ng	0
	MP2 Untreated	500ng	0.203778
	MP2 Untreated	50ng	0
	MP2 Untreated	5ng	0
	MP2 Untreated	0.5ng	0
	MP2 Untreated	0.05ng	0
	MP2 Untreated	0.005ng	0
	MP2 Untreated	0.005ng	0
	SA1 m6A_Mtase treated	500ng	1
	SA1 m6A_Mtase treated	50ng	1.3567
	SA1 m6A_Mtase treated	5ng	1.12325
	SA1 m6A_Mtase treated	0.5ng	0.460855
	SA1 m6A_Mtase treated	0.05ng	0.0906563
	SA1 m6A_Mtase treated	0.005ng	0
	SA1 m6A_Mtase treated	0.005ng	0
	SA1 Untreated	500ng	0.546786
	SA1 Untreated	50ng	0.0774279
	SA1 Untreated	5ng	0
	SA1 Untreated	0.5ng	0
	SA1 Untreated	0.05ng	0
	SA1 Untreated	0.005ng	0
	SA1 Untreated	0.005ng	0
	AM2 m6A_Mtase treated	500ng	1
	AM2 m6A_Mtase treated	50ng	1.39815
	AM2 m6A_Mtase treated	5ng	0.636838
	AM2 m6A_Mtase treated	0.5ng	0.195102
	AM2 m6A_Mtase treated	0.05ng	0
	AM2 m6A_Mtase treated	0.005ng	0
	AM2 m6A_Mtase treated	0.005ng	0
	AM2 Untreated	500ng	0.371705
	AM2 Untreated	50ng	0.192083
	AM2 Untreated	5ng	0.0579363
	AM2 Untreated	0.5ng	0
	AM2 Untreated	0.05ng	0
	AM2 Untreated	0.005ng	0
	AM2 Untreated	0.005ng	0
	DG1 m6A_Mtase treated	500ng	1
	DG1 m6A_Mtase treated	50ng	1.68637
	DG1 m6A_Mtase treated	5ng	1.01297
	DG1 m6A_Mtase treated	0.5ng	0.222119
	DG1 m6A_Mtase treated	0.05ng	0
	DG1 m6A_Mtase treated	0.005ng	0
	DG1 m6A_Mtase treated	0.005ng	0
	DG1 Untreated	500ng	0.825433
	DG1 Untreated	50ng	0.230209
	DG1 Untreated	5ng	0.0425569
	DG1 Untreated	0.5ng	0
	DG1 Untreated	0.05ng	0
	DG1 Untreated	0.005ng	0
	DG1 Untreated	0.005ng	0
